## S2 Figure

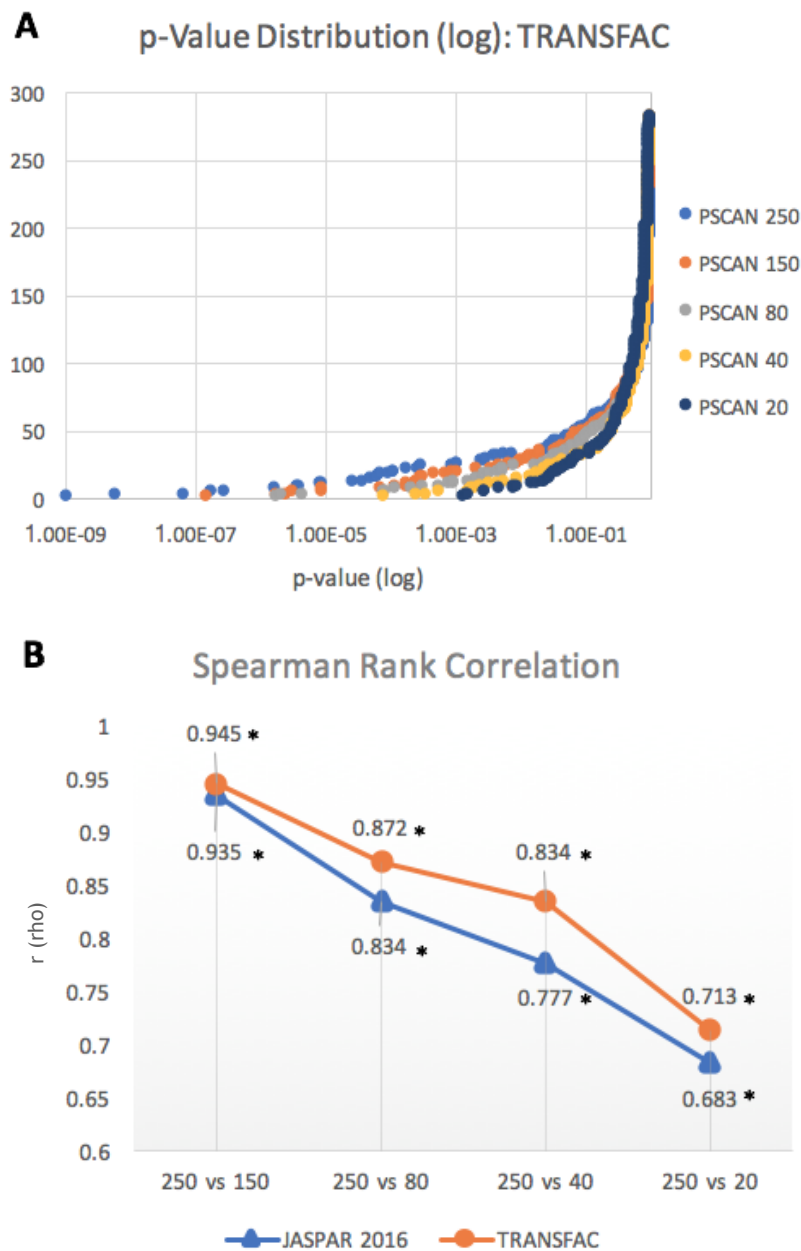

### S2 Figure. Enrichment score distributions and Spearman Rank comparisons for differently sized gene sets.

**A.** Log distributions of the p-values representing transcription factor binding scores for a selection of 250, 150, 80, 40 or 20 genes, equally split for the most up- and down-regulated transcripts present in a transcriptome data set (using sample ERIQ, PSCAN and TRANSFAC motifs). As expected, the affinities followed an enrichment trend towards highly significant motifs in larger selections.

**B.** Spearman Rank Correlation comparing the largest selection (n=250) and each smaller one (SPSS package, Vers. 24, 2017). Shown is the correlation factor  $r$  (rho) obtained for comparisons of smaller sets against the largest set of 250 transcripts, using TRANSFAC and JASPAR motifs. High  $|r|$  values represents a good correlation between two sets and therefore minimal difference in rank correlations. This analysis confirmed our choice of 150 transcripts for all samples, with an  $r$  of .945 and 0.935 in TRANSFAC and JASPER, respectively ( $p < 0.0001$ ). While smaller sets would be desirable to reduce false positives, the correlation values drop significantly.
